# Supplementary material for: Dose- and Time-Dependent Effects of Radiofrequency Electromagnetic Field on Adipose Tissue: Implications of Thermoregulation and Mitochondrial Signaling
Source: MDPI journal article supplement (doi:10.3390/ijms241310628), 2023-06-25
Supplement: s1 [file s1]

### **Supplementary material S1 – Housekeeping genes formalisation**

#### **WAT**

| Method                                                   | 1            | 2          |
|----------------------------------------------------------|--------------|------------|
| <a href="#">Delta CT</a>                                 | gapdh        | 18S        |
| <a href="#">BestKeeper</a>                               | 18S          | gapdh      |
| <a href="#">Normfinder</a>                               | gapdh        | 18S        |
| <a href="#">Genorm</a>                                   | 18S   gapdh  |            |
| <b><a href="#">Recommended comprehensive ranking</a></b> | <b>gapdh</b> | <b>18S</b> |

#### **BAT**

| <b>Ranking Order (Better--Good--Average)</b>             |             |              |
|----------------------------------------------------------|-------------|--------------|
| Method                                                   | 1           | 2            |
| <a href="#">Delta CT</a>                                 | 18S         | gapdh        |
| <a href="#">BestKeeper</a>                               | 18S         | gapdh        |
| <a href="#">Normfinder</a>                               | 18S         | gapdh        |
| <a href="#">Genorm</a>                                   | gapdh   18S |              |
| <b><a href="#">Recommended comprehensive ranking</a></b> | <b>18S</b>  | <b>gapdh</b> |

**Table S1 Stability of housekeeping genes using the programs BestKeeper, Normfinder, and Genorm in WAT and BAT.**
